# Supplementary material
Source: publisher figshare collection journal article supplement (https://sage.figshare.com/ndownloader/files/23297024)
Supplement: Supplementary file 1 [file 23297024]

## Sheet: A side
A side
	No.	Vx (m/s)	Vy (m/s)	Vz (m/s)	V (m/s)
Diffuser A1	1	0.0716699	-1.15602	0.323875	1.20267
	2	0.0818403	-1.32006	0.369835	1.37333
	3	0.0861707	-1.38991	0.389404	1.446
	4	0.0886339	-1.42964	0.400535	1.48733
	5	0.0920108	-1.48411	0.415796	1.544
	6	0.0973741	-1.57062	0.440032	1.634
	7	0.114378	-1.84489	0.516872	1.91933
	8	0.114378	-1.84489	0.516872	1.91933
	9	0.10091	-1.62765	0.456011	1.69333
	10	0.116325	-1.87628	0.525669	1.952
	11	0.112868	-1.82053	0.51005	1.894
	12	0.112272	-1.81092	0.507357	1.884
	13	0.11267	-1.81733	0.509152	1.89067
	14	0.110008	-1.7744	0.497123	1.846
	15	0.107068	-1.72698	0.483838	1.79667
	16	0.103856	-1.75604	0.474207	1.822
	17	0.1015	-1.7162	0.463449	1.78067
	18	0.0994098	-1.68087	0.453906	1.744
	19	0.0972818	-1.64488	0.444189	1.70667
	20	0.0940551	-1.67805	0.434753	1.736
	21	0.0953124	-1.70369	0.431096	1.76
	22	0.0953124	-1.70369	0.431096	1.76
	23	0.0953124	-1.70369	0.431096	1.76
	24	0.0953124	-1.70369	0.431096	1.76
	25	0.0952679	-1.70622	0.421119	1.76
	26	0.0890379	-1.70424	0.430225	1.76
	27	0.0890379	-1.70424	0.430225	1.76
	28	0.0890379	-1.70424	0.430225	1.76
	29	0.0890379	-1.70424	0.430225	1.76
	30	0.0825126	-1.70218	0.439763	1.76
	31	0.0628461	-1.67141	0.536949	1.76
	32	0.0628461	-1.67141	0.536949	1.76
	33	0.0628461	-1.67141	0.536949	1.76
	34	0.0628461	-1.67141	0.536949	1.76
	35	0.0416209	-1.64476	0.645369	1.76733
	36	0.0517816	-1.66058	0.684907	1.79733
	37	0.0517816	-1.66058	0.684907	1.79733
	38	0.0517816	-1.66058	0.684907	1.79733
	39	0.0517816	-1.66058	0.684907	1.79733
	40	0.0626226	-1.67554	0.726503	1.82733
	41	0.0669808	-1.67303	0.761442	1.83967
	42	0.0669929	-1.67333	0.76158	1.84
	43	0.0669929	-1.67333	0.76158	1.84
	44	0.0669929	-1.67333	0.76158	1.84
	45	0.0712717	-1.67075	0.795868	1.852
	46	0.055166	-1.63292	0.848015	1.842
	47	0.0551061	-1.63114	0.847094	1.84
	48	0.0551061	-1.63114	0.847094	1.84
	49	0.0551061	-1.63114	0.847094	1.84
	50	0.0388323	-1.59466	0.900981	1.832
	51	0.0481175	-1.66841	0.749929	1.837
	52	0.048196	-1.67113	0.751153	1.84
	53	0.048196	-1.67113	0.751153	1.84
	54	0.048196	-1.67113	0.751153	1.84
	55	0.0566826	-1.73529	0.609226	1.84
	56	0.0474573	-1.73883	0.599685	1.84
	57	0.0474573	-1.73883	0.599685	1.84
	58	0.0474573	-1.73883	0.599685	1.84
	59	0.0474573	-1.73883	0.599685	1.84
	60	0.0382892	-1.74426	0.590801	1.842
	61	0.0346301	-1.74182	0.598112	1.842
	62	0.0346301	-1.74182	0.598112	1.842
	63	0.0346301	-1.74182	0.598112	1.842
	64	0.0346301	-1.74182	0.598112	1.842
	65	0.0309122	-1.73624	0.604334	1.83867
	66	0.045161	-1.74558	0.628558	1.856
	67	0.0452583	-1.74934	0.629913	1.86
	68	0.0452583	-1.74934	0.629913	1.86
	69	0.0452583	-1.74934	0.629913	1.86
	70	0.0590851	-1.75509	0.652351	1.87333
	71	0.0474602	-1.70365	0.681228	1.836
	72	0.0475636	-1.70736	0.682713	1.84
	73	0.0475636	-1.70736	0.682713	1.84
	74	0.0475636	-1.70736	0.682713	1.84
	75	0.036137	-1.65268	0.708896	1.79867
	76	0.0376342	-1.64608	0.733469	1.80267
	77	0.0375785	-1.64365	0.732384	1.8
	78	0.0375785	-1.64365	0.732384	1.8
	79	0.0375785	-1.64365	0.732384	1.8
	80	0.0389605	-1.63363	0.754817	1.8
	81	0.0502803	-1.62861	0.764758	1.8
	82	0.0502803	-1.62861	0.764758	1.8
	83	0.0502803	-1.62861	0.764758	1.8
	84	0.0502803	-1.62861	0.764758	1.8
	85	0.0616767	-1.62967	0.777436	1.80667
	86	0.0847684	-1.63575	0.761814	1.80667
	87	0.0847684	-1.63575	0.761814	1.80667
	88	0.0847684	-1.63575	0.761814	1.80667
	89	0.0847684	-1.63575	0.761814	1.80667
	90	0.106617	-1.61709	0.734639	1.77933
	91	0.105775	-1.62498	0.755796	1.79533
	92	0.105775	-1.62498	0.755796	1.79533
	93	0.105775	-1.62498	0.755796	1.79533
	94	0.105775	-1.62498	0.755796	1.79533
	95	0.104955	-1.63296	0.776769	1.81133
	96	0.0859413	-1.58881	0.816577	1.78933
	97	0.0859413	-1.58881	0.816577	1.78933
	98	0.0859413	-1.58881	0.816577	1.78933
	99	0.0859413	-1.58881	0.816577	1.78933
	100	0.0679714	-1.54609	0.85349	1.76733
	101	0.100096	-1.5455	0.85343	1.76867
	102	0.100096	-1.5455	0.85343	1.76867
	103	0.100096	-1.5455	0.85343	1.76867
	104	0.100096	-1.5455	0.85343	1.76867
	105	0.139423	-1.5445	0.853213	1.77
Diffuser A2	1	-0.14516	-0.865458	0.317839	0.933333
	2	-0.207756	-1.42865	0.446008	1.51267
	3	-0.225061	-1.54765	0.483159	1.63867
	4	-0.228999	-1.57472	0.491612	1.66733
	5	-0.212688	-1.66282	0.447228	1.735
	6	-0.193774	-1.60365	0.604541	1.73267
	7	-0.193625	-1.60242	0.604075	1.73133
	8	-0.19698	-1.63018	0.614543	1.76133
	9	-0.197353	-1.63327	0.615706	1.76467
	10	-0.178437	-1.57156	0.767412	1.758
	11	-0.172147	-1.58787	0.806842	1.78967
	12	-0.172147	-1.58787	0.806842	1.78967
	13	-0.172147	-1.58787	0.806842	1.78967
	14	-0.172147	-1.58787	0.806842	1.78967
	15	-0.16498	-1.60308	0.848635	1.82133
	16	-0.158497	-1.62763	0.821163	1.83033
	17	-0.158497	-1.62763	0.821163	1.83033
	18	-0.158497	-1.62763	0.821163	1.83033
	19	-0.158497	-1.62763	0.821163	1.83033
	20	-0.150925	-1.65466	0.788964	1.83933
	21	-0.119601	-1.65241	0.822259	1.85
	22	-0.119601	-1.65241	0.822259	1.85
	23	-0.119601	-1.65241	0.822259	1.85
	24	-0.119601	-1.65241	0.822259	1.85
	25	-0.0939462	-1.65224	0.850498	1.86067
	26	-0.107433	-1.66886	0.889333	1.89433
	27	-0.107433	-1.66886	0.889333	1.89433
	28	-0.107433	-1.66886	0.889333	1.89433
	29	-0.107433	-1.66886	0.889333	1.89433
	30	-0.122563	-1.68362	0.931436	1.928
	31	-0.117973	-1.66558	0.952816	1.92267
	32	-0.117973	-1.66558	0.952816	1.92267
	33	-0.117973	-1.66558	0.952816	1.92267
	34	-0.117973	-1.66558	0.952816	1.92267
	35	-0.113643	-1.64834	0.972737	1.91733
	36	-0.094842	-1.68066	0.918551	1.91867
	37	-0.094842	-1.68066	0.918551	1.91867
	38	-0.094842	-1.68066	0.918551	1.91867
	39	-0.094842	-1.68066	0.918551	1.91867
	40	-0.0777207	-1.7102	0.869245	1.92
	41	-0.108836	-1.67654	0.887565	1.90067
	42	-0.108836	-1.67654	0.887565	1.90067
	43	-0.108836	-1.67654	0.887565	1.90067
	44	-0.108836	-1.67654	0.887565	1.90067
	45	-0.140861	-1.64242	0.906657	1.88133
	46	-0.155309	-1.66563	0.900619	1.9
	47	-0.155309	-1.66563	0.900619	1.9
	48	-0.155309	-1.66563	0.900619	1.9
	49	-0.155309	-1.66563	0.900619	1.9
	50	-0.170072	-1.689	0.894218	1.91867
	51	-0.14709	-1.52689	0.84667	1.75243
	52	-0.14709	-1.52689	0.84667	1.75243
	53	-0.14709	-1.52689	0.84667	1.75243
	54	-0.14709	-1.52689	0.84667	1.75243
	55	-0.126054	-1.3685	0.792059	1.5862
	56	-0.136008	-1.49929	0.831495	1.7201
	57	-0.136008	-1.49929	0.831495	1.7201
	58	-0.136008	-1.49929	0.831495	1.7201
	59	-0.136008	-1.49929	0.831495	1.7201
	60	-0.145843	-1.63272	0.866183	1.854
	61	-0.114153	-1.6357	0.909429	1.87567
	62	-0.114153	-1.6357	0.909429	1.87567
	63	-0.114153	-1.6357	0.909429	1.87567
	64	-0.114153	-1.6357	0.909429	1.87567
	65	-0.0810223	-1.63799	0.954104	1.89733
	66	-0.0702722	-1.69119	0.897797	1.91767
	67	-0.0702722	-1.69119	0.897797	1.91767
	68	-0.0702722	-1.69119	0.897797	1.91767
	69	-0.0702722	-1.69119	0.897797	1.91767
	70	-0.0582669	-1.74825	0.834303	1.938
	71	-0.0668378	-1.74885	0.868448	1.954
	72	-0.0668378	-1.74885	0.868448	1.954
	73	-0.0668378	-1.74885	0.868448	1.954
	74	-0.0668378	-1.74885	0.868448	1.954
	75	-0.0752129	-1.74979	0.901933	1.97
	76	-0.0417664	-1.70582	0.974514	1.967
	77	-0.0417664	-1.70582	0.974514	1.967
	78	-0.0417664	-1.70582	0.974514	1.967
	79	-0.0417664	-1.70582	0.974514	1.967
	80	-0.0102216	-1.66421	1.04288	1.964
	81	-0.0357109	-1.7066	0.909102	1.939
	82	-0.0357109	-1.7066	0.909102	1.939
	83	-0.0357109	-1.7066	0.909102	1.939
	84	-0.0357109	-1.7066	0.909102	1.939
	85	-0.0609075	-1.74826	0.776705	1.914
	86	-0.0716934	-1.74198	0.850203	1.941
	87	-0.0716934	-1.74198	0.850203	1.941
	88	-0.0716934	-1.74198	0.850203	1.941
	89	-0.0716934	-1.74198	0.850203	1.941
	90	-0.0828578	-1.73451	0.926086	1.968
	91	-0.0449406	-1.69647	0.926525	1.934
	92	-0.0449406	-1.69647	0.926525	1.934
	93	-0.0449406	-1.69647	0.926525	1.934
	94	-0.0449406	-1.69647	0.926525	1.934
	95	-0.0039144	-1.65775	0.928364	1.9
	96	-0.0120981	-1.73462	0.845024	1.932
	97	-0.0120981	-1.73462	0.845024	1.932
	98	-0.0120981	-1.73462	0.845024	1.932
	99	-0.0120981	-1.73462	0.845024	1.932
	100	-0.0187051	-1.80198	0.780908	1.964
	101	-0.0436906	-1.8056	0.780405	1.96767
	102	-0.0436906	-1.8056	0.780405	1.96767
	103	-0.0436906	-1.8056	0.780405	1.96767
	104	-0.0436906	-1.8056	0.780405	1.96767
	105	-0.0669683	-1.8092	0.780037	1.97133
	106	-0.0429437	-1.76293	0.796402	1.93533
	107	-0.0429437	-1.76293	0.796402	1.93533
	108	-0.0429437	-1.76293	0.796402	1.93533
	109	-0.0429437	-1.76293	0.796402	1.93533
	110	-0.0216143	-1.71822	0.809149	1.89933
	111	0.00842119	-1.80635	0.526625	1.913
	112	0.00848135	-1.81925	0.530387	1.92667
	113	0.00848135	-1.81925	0.530387	1.92667
Diffuser A3	1	-0.209355	-1.47709	0.20905	1.50643
	2	-0.169971	-1.52139	0.279832	1.558
	3	-0.174189	-1.55915	0.286777	1.59667
	4	-0.173618	-1.55404	0.285836	1.59143
	5	-0.135039	-1.58891	0.352255	1.63308
	6	-0.119007	-1.55403	0.426093	1.61769
	7	-0.11946	-1.55994	0.427714	1.62385
	8	-0.117023	-1.52811	0.418987	1.59071
	9	-0.117496	-1.53429	0.420681	1.59714
	10	-0.105704	-1.54439	0.501885	1.62733
	11	-0.0672492	-1.48755	0.578438	1.60067
	12	-0.0671091	-1.48445	0.577233	1.59733
	13	-0.0671091	-1.48445	0.577233	1.59733
	14	-0.0682855	-1.51047	0.587352	1.62533
	15	-0.0289428	-1.51003	0.695291	1.66267
	16	-0.029291	-1.52819	0.703654	1.68267
	17	-0.0299524	-1.56271	0.719545	1.72067
	18	-0.0315199	-1.64449	0.757201	1.81071
	19	-0.0324243	-1.69167	0.778926	1.86267
	20	-0.0322411	-1.68211	0.774526	1.85214
	21	-0.0300469	-1.69427	0.811884	1.87923
	22	-0.0287695	-1.62224	0.777366	1.79933
	23	-0.0285989	-1.61262	0.772757	1.78867
	24	-0.0281832	-1.58918	0.761525	1.76267
	25	-0.0261643	-1.61724	0.807902	1.808
	26	-0.0300608	-1.65133	0.823064	1.84533
	27	-0.0297892	-1.63642	0.81563	1.82867
	28	-0.0305324	-1.67724	0.835978	1.87429
	29	-0.0299989	-1.64794	0.821371	1.84154
	30	-0.0328709	-1.62742	0.809333	1.81786
	31	-0.0425842	-1.65249	0.703069	1.79929
	32	-0.0420914	-1.63337	0.694932	1.77846
	33	-0.0419588	-1.62822	0.692743	1.77286
	34	-0.0422067	-1.63784	0.696836	1.78333
	35	-0.0517717	-1.68778	0.611331	1.79583
	36	-0.0382684	-1.69741	0.603523	1.802
	37	-0.0373623	-1.65722	0.589234	1.75933
	38	-0.0375039	-1.6635	0.591466	1.766
	39	-0.0375235	-1.66436	0.591776	1.76692
	40	-0.0231204	-1.63813	0.571145	1.735
	41	-0.0184298	-1.6691	0.600431	1.774
	42	-0.018293	-1.65671	0.595974	1.76083
	43	-0.0184575	-1.67161	0.601333	1.77667
	44	-0.0194831	-1.76449	0.634745	1.87538
	45	-0.0139565	-1.76444	0.654656	1.88203
	46	-0.0164798	-1.77788	0.636779	1.88867
	47	-0.0165106	-1.7812	0.637967	1.89219
	48	-0.0165413	-1.78451	0.639155	1.89571
	49	-0.0166255	-1.79359	0.642407	1.90536
	50	-0.0191087	-1.80966	0.626083	1.915
	51	-0.0268142	-1.75679	0.73611	1.90929
	52	-0.0267339	-1.75153	0.733907	1.90357
	53	-0.0267463	-1.75234	0.734246	1.90445
	54	-0.0267587	-1.75315	0.734586	1.90533
	55	-0.0354298	-1.70324	0.860146	1.90844
	56	-0.0322664	-1.65969	0.943419	1.91154
	57	-0.0321208	-1.6522	0.939161	1.90291
	58	-0.0319752	-1.64471	0.934904	1.89429
	59	-0.0316999	-1.63055	0.926854	1.87798
	60	-0.0284789	-1.57404	0.993682	1.86167
	61	-0.022978	-1.60798	0.96102	1.87405
	62	-0.0231298	-1.6186	0.967369	1.88643
	63	-0.0231847	-1.62244	0.969666	1.89091
	64	-0.0232396	-1.62629	0.971962	1.89538
	65	-0.0168221	-1.65365	0.92809	1.89636
	66	-0.00988733	-1.63076	0.968604	1.89733
	67	-0.00981958	-1.61959	0.961968	1.88433
	68	-0.00975184	-1.60841	0.955331	1.87133
	69	-0.00979179	-1.615	0.959245	1.879
	70	-0.0029633	-1.59811	1.00276	1.88667
	71	0.00550745	-1.68526	0.826965	1.88641
	72	0.0055067	-1.68503	0.826852	1.88615
	73	0.00548208	-1.6775	0.823155	1.87772
	74	0.00545745	-1.66996	0.819458	1.86929
	75	0.0129725	-1.74717	0.663429	1.86893
	76	-0.0391769	-1.71733	0.729279	1.86857
	77	-0.0391677	-1.71692	0.729107	1.86813
	78	-0.0391585	-1.71652	0.728936	1.86769
	79	-0.038715	-1.69708	0.72068	1.84654
	80	-0.0957494	-1.64512	0.785145	1.82538
	81	-0.0767477	-1.65432	0.863264	1.86885
	82	-0.0785325	-1.69279	0.88334	1.91231
	83	-0.0792433	-1.70811	0.891335	1.92962
	84	-0.0799541	-1.72344	0.89933	1.94692
	85	-0.0579149	-1.67224	0.946818	1.92255
	86	-0.0583223	-1.63786	0.957302	1.89818
	87	-0.0589293	-1.65491	0.967265	1.91794
	88	-0.0595363	-1.67195	0.977228	1.93769
	89	-0.0591818	-1.662	0.971409	1.92615
	90	-0.0599689	-1.63886	0.988078	1.91462
	91	-0.0617337	-1.65378	0.967333	1.91708
	92	-0.061813	-1.6559	0.968575	1.91954
	93	-0.0616798	-1.65233	0.966488	1.9154
	94	-0.0615466	-1.64877	0.964401	1.91127
	95	-0.064181	-1.68645	0.956479	1.93986
	96	-0.0546402	-1.69117	1.00506	1.96846
	97	-0.0535513	-1.65746	0.985028	1.92923
	98	-0.0524623	-1.62376	0.964997	1.89
	99	-0.0510707	-1.58069	0.9394	1.83987
	100	-0.0403696	-1.51974	0.944411	1.78973
	101	-0.0290256	-1.57434	0.991818	1.86102
	102	-0.0301374	-1.63465	1.02981	1.93231
	103	-0.0302334	-1.63985	1.03309	1.93846
	104	-0.0303294	-1.64506	1.03637	1.94462
	105	-0.0168267	-1.6403	1.0475	1.94631
	106	-0.0168413	-1.64172	1.04841	1.948
	107	-0.0166742	-1.62543	1.038	1.92867
	108	-0.016507	-1.60914	1.0276	1.90933
	109	-0.0167837	-1.63611	1.04482	1.94133
	110	-0.0170603	-1.66307	1.06204	1.97333
	111	-0.0171407	-1.67091	1.06705	1.98263
	112	-0.017221	-1.67874	1.07205	1.99192
	113	-0.017221	-1.67874	1.07205	1.99192
Diffuser A4	1	-0.278522	-1.63987	0.786681	1.84
	2	-0.211954	-1.70932	0.735847	1.87533
	3	-0.212029	-1.70993	0.736108	1.876
	4	-0.156032	-1.75308	0.688806	1.89
	5	-0.127186	-1.68656	0.802048	1.87667
	6	-0.12687	-1.68237	0.800054	1.872
	7	-0.097739	-1.61069	0.910217	1.85267
	8	-0.10652	-1.60845	0.917167	1.85467
	9	-0.105372	-1.59111	0.907277	1.83467
	10	-0.114477	-1.59706	0.918698	1.846
	11	-0.110223	-1.60313	0.894644	1.83933
	12	-0.109504	-1.59267	0.888807	1.82733
	13	-0.106492	-1.61744	0.874933	1.842
	14	-0.113223	-1.58402	0.869691	1.81067
	15	-0.114974	-1.60852	0.88314	1.83867
	16	-0.125375	-1.61907	0.902799	1.858
	17	-0.119839	-1.57754	0.891482	1.816
	18	-0.120719	-1.58913	0.898027	1.82933
	19	-0.118169	-1.58497	0.907087	1.83
	20	-0.119116	-1.59767	0.914357	1.84467
	21	-0.192376	-1.55762	0.937232	1.828
	22	-0.166124	-1.57234	0.900288	1.82
	23	-0.170842	-1.53711	0.925858	1.80467
	24	-0.1438	-1.60507	0.876961	1.83467
	25	-0.163528	-1.59673	0.847456	1.81533
	26	-0.164368	-1.60494	0.851813	1.82467
	27	-0.184067	-1.59603	0.821966	1.80467
	28	-0.183994	-1.59198	0.81073	1.796
	29	-0.184608	-1.5973	0.813439	1.802
	30	-0.181609	-1.56789	0.789164	1.76467
	31	-0.181299	-1.55643	0.804133	1.76133
	32	-0.183152	-1.57233	0.812351	1.77933
	33	-0.195332	-1.66766	0.883527	1.89733
	34	-0.23363	-1.6294	0.930046	1.892
	35	-0.232066	-1.61849	0.923819	1.87933
	36	-0.259264	-1.51238	0.929474	1.794
	37	-0.0669097	-1.59375	0.878841	1.83286
	38	-0.0678032	-1.61503	0.890577	1.85733
	39	0.115246	-1.65998	0.825146	1.85733
	40	-0.0754072	-1.60876	0.837539	1.82667
	41	-0.308296	-1.69633	0.929413	1.95867
	42	-0.286074	-1.69406	0.894689	1.93733
	43	-0.273277	-1.61828	0.854665	1.85067
	44	-0.271034	-1.72234	0.879204	1.95267
	45	-0.266414	-1.72895	0.938851	1.986
	46	-0.250496	-1.62564	0.882753	1.86733
	47	-0.237575	-1.57508	0.90629	1.83267
	48	-0.239008	-1.61849	0.879584	1.85807
	49	-0.246546	-1.66953	0.907324	1.91667
	50	-0.250221	-1.73246	0.884751	1.96133
	51	-0.249905	-1.74638	0.900377	1.98067
	52	-0.240653	-1.68172	0.867041	1.90733
	53	-0.243813	-1.71977	0.895024	1.954
	54	-0.262793	-1.74194	0.90518	1.98067
	55	-0.25844	-1.71309	0.890186	1.94786
	56	-0.271566	-1.69016	0.876824	1.92333
	57	-0.130318	-1.7255	0.856586	1.93533
	58	-0.133011	-1.76116	0.87429	1.97533
	59	-0.0153551	-1.73821	0.832466	1.92733
	60	-0.0830071	-1.77772	0.846739	1.972
	61	-0.0816602	-1.74887	0.832999	1.94
	62	-0.0804535	-1.72303	0.82069	1.91133
	63	-0.150192	-1.76071	0.833943	1.954
	64	-0.082923	-1.77592	0.84588	1.97
	65	-0.0803413	-1.72063	0.819545	1.90867
	66	-0.0156685	-1.77368	0.849455	1.96667
	67	-0.021327	-1.74915	0.810293	1.928
	68	-0.0219612	-1.80117	0.834389	1.98533
	69	-0.0277001	-1.80105	0.80755	1.974
	70	-0.0322514	-1.80355	0.776244	1.964
	71	-0.0320872	-1.79437	0.772292	1.954
	72	-0.0373659	-1.83319	0.756059	1.98333
	73	-0.0433825	-1.80826	0.742696	1.95533
	74	-0.04427	-1.84525	0.75789	1.99533
	75	-0.0500167	-1.81352	0.741785	1.96
	76	-0.0552972	-1.84496	0.743674	1.99
	77	-0.0550749	-1.83754	0.740684	1.982
	78	-0.0588206	-1.8207	0.723328	1.96
	79	-0.0675226	-1.72656	0.85671	1.93533
	80	-0.0684065	-1.74916	0.867924	1.96067
	81	-0.0782539	-1.67719	1.01635	1.96267
	82	-0.0763353	-1.65068	0.911185	1.88867
	83	-0.0763488	-1.65097	0.911346	1.889
	84	-0.079379	-1.7323	0.860771	1.936
	85	-0.0786763	-1.74046	0.836181	1.93267
	86	-0.079219	-1.75247	0.841949	1.946
	87	-0.0766617	-1.71771	0.799013	1.896
	88	-0.070772	-1.69567	0.846639	1.89733
	89	-0.0741042	-1.77551	0.886501	1.98667
	90	-0.0674768	-1.73913	0.928598	1.97267
	91	-0.0635384	-1.74849	0.933982	1.98333
	92	-0.0643713	-1.77142	0.946226	2.00933
	93	-0.0597519	-1.76256	0.941879	1.99933
	94	-0.0599213	-1.74836	0.930218	1.98133
	95	-0.0601027	-1.75366	0.933035	1.98733
	96	-0.0611423	-1.76476	0.934817	1.998
	97	-0.0963592	-1.76328	0.875521	1.972
	98	-0.0993562	-1.81812	0.902751	2.03333
	99	-0.136882	-1.86472	0.867861	2.06133
	100	-0.138344	-1.66486	0.696212	1.81133
	101	-0.159068	-1.91425	0.800503	2.08267
	102	-0.182524	-1.97694	0.737787	2.118
	103	-0.182697	-1.9788	0.738484	2.12
	104	-0.184592	-1.99934	0.746147	2.142
	105	-0.179766	-1.94707	0.72664	2.086
Diffuser A5	1	-0.484099	-1.48614	0.303209	1.59213
	2	-0.353393	-1.56775	0.591721	1.73829
	3	-0.357401	-1.58553	0.598432	1.758
	4	-0.355775	-1.57831	0.595709	1.75
	5	-0.201257	-1.52637	0.822932	1.74571
	6	-0.175477	-1.54452	0.773971	1.73733
	7	-0.175457	-1.54435	0.773887	1.73714
	8	-0.172211	-1.51577	0.759567	1.705
	9	-0.180257	-1.5866	0.795058	1.78467
	10	-0.15633	-1.60123	0.749034	1.77467
	11	-0.154027	-1.55643	0.837234	1.77667
	12	-0.154201	-1.55819	0.838176	1.77867
	13	-0.154172	-1.55789	0.838019	1.77833
	14	-0.154143	-1.5576	0.837862	1.778
	15	-0.152684	-1.52212	0.926909	1.78867
	16	-0.0932074	-1.55962	0.888713	1.79933
	17	-0.0930692	-1.55731	0.887396	1.79667
	18	-0.0929311	-1.555	0.886079	1.794
	19	-0.0933973	-1.5628	0.890524	1.803
	20	-0.0300572	-1.60063	0.848771	1.812
	21	-0.101362	-1.60992	0.811349	1.80767
	22	-0.101119	-1.60606	0.809404	1.80333
	23	-0.101194	-1.60725	0.810003	1.80467
	24	-0.101268	-1.60843	0.810601	1.806
	25	-0.183033	-1.64399	0.78118	1.82933
	26	-0.19478	-1.65054	0.818056	1.85267
	27	-0.194114	-1.6449	0.815259	1.84633
	28	-0.193448	-1.63925	0.812463	1.84
	29	-0.192502	-1.63124	0.808489	1.831
	30	-0.200103	-1.61012	0.828955	1.822
	31	-0.226252	-1.60634	0.829083	1.822
	32	-0.226252	-1.60634	0.829083	1.822
	33	-0.228898	-1.62513	0.838779	1.84331
	34	-0.231544	-1.64392	0.848475	1.86462
	35	-0.257772	-1.61827	0.837558	1.84031
	36	-0.126045	-1.60994	0.822296	1.816
	37	-0.127543	-1.62908	0.832069	1.83758
	38	-0.129041	-1.64821	0.841842	1.85917
	39	-0.127103	-1.62346	0.829201	1.83125
	40	-0.0189355	-1.60952	0.813084	1.80333
	41	-0.0911184	-1.64416	0.786527	1.82667
	42	-0.0922823	-1.66516	0.796573	1.85
	43	-0.0925139	-1.66934	0.798573	1.85464
	44	-0.0927455	-1.67352	0.800572	1.85929
	45	-0.162409	-1.67415	0.758137	1.84498
	46	-0.118718	-1.63594	0.809422	1.83067
	47	-0.118999	-1.63981	0.811338	1.835
	48	-0.11928	-1.64368	0.813254	1.83933
	49	-0.119301	-1.64398	0.813401	1.83967
	50	-0.076059	-1.61855	0.871835	1.84
	51	-0.141928	-1.62847	0.921498	1.878
	52	-0.1448	-1.66142	0.940143	1.916
	53	-0.147923	-1.69726	0.960425	1.95733
	54	-0.151047	-1.7331	0.980706	1.99867
	55	-0.217503	-1.69328	1.00557	1.98133
	56	-0.189463	-1.68925	0.983298	1.964
	57	-0.187789	-1.67432	0.974608	1.94664
	58	-0.186114	-1.65939	0.965918	1.92929
	59	-0.187556	-1.67224	0.973398	1.94423
	60	-0.163643	-1.69555	0.967811	1.95917
	61	-0.162456	-1.73008	0.919685	1.96692
	62	-0.163096	-1.73689	0.923309	1.97467
	63	-0.163818	-1.74458	0.927394	1.9834
	64	-0.16454	-1.75227	0.93148	1.99214
	65	-0.160167	-1.75162	0.866406	1.96074
	66	-0.16459	-1.71049	0.876708	1.92933
	67	-0.164619	-1.71079	0.876859	1.92967
	68	-0.164647	-1.71109	0.87701	1.93
	69	-0.160666	-1.66971	0.855805	1.88333
	70	-0.163549	-1.6155	0.858345	1.83667
	71	-0.16236	-1.63611	0.802263	1.83033
	72	-0.161798	-1.63045	0.799487	1.824
	73	-0.160911	-1.62151	0.795104	1.814
	74	-0.160024	-1.61257	0.790721	1.804
	75	-0.162263	-1.66558	0.754886	1.83585
	76	-0.185126	-1.66508	0.822786	1.86769
	77	-0.184851	-1.66261	0.821564	1.86492
	78	-0.184576	-1.66014	0.820342	1.86214
	79	-0.185825	-1.67137	0.82589	1.87474
	80	-0.20852	-1.65116	0.890067	1.88733
	81	-0.18142	-1.67202	0.863406	1.891
	82	-0.181772	-1.67527	0.86508	1.89467
	83	-0.181804	-1.67556	0.865232	1.895
	84	-0.181836	-1.67585	0.865385	1.89533
	85	-0.155614	-1.70183	0.841776	1.905
	86	-0.188372	-1.69869	0.862293	1.91467
	87	-0.18852	-1.70003	0.862975	1.91618
	88	-0.188669	-1.70137	0.863656	1.91769
	89	-0.183969	-1.65899	0.84214	1.86992
	90	-0.208619	-1.60579	0.835539	1.82214
	91	-0.232639	-1.62209	0.875476	1.85821
	92	-0.237155	-1.65357	0.892471	1.89429
	93	-0.237972	-1.65927	0.895544	1.90081
	94	-0.238788	-1.66496	0.898618	1.90733
	95	-0.261158	-1.65742	0.928228	1.91751
	96	-0.247607	-1.68403	0.904143	1.92769
	97	-0.248697	-1.69144	0.908124	1.93618
	98	-0.249788	-1.69886	0.912105	1.94467
	99	-0.248803	-1.69216	0.908509	1.937
	100	-0.234212	-1.70169	0.878486	1.92933
	101	-0.184566	-1.72573	0.813238	1.91833
	102	-0.183508	-1.71584	0.808575	1.90733
	103	-0.187677	-1.75482	0.826945	1.95067
	104	-0.191846	-1.7938	0.845316	1.994
	105	-0.142727	-1.77923	0.768695	1.94343
	106	-0.113731	-1.761	0.68083	1.89286
	107	-0.116927	-1.81048	0.69996	1.94604
	108	-0.120122	-1.85996	0.71909	1.99923
	109	-0.117442	-1.81846	0.703043	1.95462
	110	-0.0922671	-1.80193	0.626616	1.91
	111	-0.0929917	-1.81608	0.631537	1.925
	112	-0.0937163	-1.83023	0.636458	1.94
	113	-0.0937163	-1.83023	0.636458	1.94
Diffuser A6	1	0.141046	-1.47149	0.806639	1.684
	2	0.191139	-1.65981	0.879221	1.88867
	3	0.190464	-1.65395	0.876117	1.882
	4	0.191948	-1.66684	0.882945	1.89667
	5	0.227027	-1.60214	0.808001	1.80867
	6	-0.0121212	-1.77426	0.744412	1.94133
	7	-0.0115135	-1.6853	0.707089	1.844
	8	-0.0120671	-1.76634	0.741089	1.93267
	9	-0.0122003	-1.78583	0.749269	1.954
	10	-0.223499	-1.88264	0.669685	2.01067
	11	-0.239178	-1.76263	0.753467	1.93467
	12	-0.25459	-1.87621	0.802019	2.05933
	13	-0.249727	-1.84037	0.786701	2.02
	14	-0.252118	-1.85799	0.79423	2.03933
	15	-0.276426	-1.85445	0.897477	2.07867
	16	-0.234644	-1.72287	0.90779	1.96267
	17	-0.22755	-1.67078	0.880347	1.90333
	18	-0.197821	-1.4525	0.765331	1.65467
	19	-0.228666	-1.67898	0.884664	1.91267
	20	-0.212909	-1.71471	0.972326	1.98267
	21	-0.230938	-1.76617	0.840579	1.97467
	22	-0.23125	-1.76855	0.841714	1.98
	23	-0.232887	-1.78107	0.847674	1.99133
	24	-0.229106	-1.75215	0.83391	1.959
	25	-0.243709	-1.78006	0.695727	1.92667
	26	-0.260614	-1.73954	0.795049	1.93333
	27	-0.260614	-1.73954	0.795049	1.93333
	28	-0.260614	-1.73954	0.795049	1.93333
	29	-0.260614	-1.73954	0.795049	1.93333
	30	-0.277545	-1.69894	0.89453	1.94
	31	-0.287382	-1.74075	0.839898	1.95533
	32	-0.287382	-1.74075	0.839898	1.95533
	33	-0.287382	-1.74075	0.839898	1.95533
	34	-0.287382	-1.74075	0.839898	1.95533
	35	-0.298072	-1.78572	0.778375	1.97067
	36	-0.271461	-1.79014	0.756838	1.96267
	37	-0.271461	-1.79014	0.756838	1.96267
	38	-0.271461	-1.79014	0.756838	1.96267
	39	-0.271461	-1.79014	0.756838	1.96267
	40	-0.248265	-1.79298	0.737771	1.95467
	41	-0.24786	-1.75163	0.783483	1.93567
	42	-0.24786	-1.75163	0.783483	1.93567
	43	-0.24786	-1.75163	0.783483	1.93567
	44	-0.24786	-1.75163	0.783483	1.93567
	45	-0.247382	-1.71114	0.827294	1.91667
	46	-0.228434	-1.72002	0.788433	1.90633
	47	-0.228434	-1.72002	0.788433	1.90633
	48	-0.228434	-1.72002	0.788433	1.90633
	49	-0.228434	-1.72002	0.788433	1.90633
	50	-0.209486	-1.72889	0.749571	1.896
	51	-0.201743	-1.75562	0.812035	1.94547
	52	-0.201743	-1.75562	0.812035	1.94547
	53	-0.201743	-1.75562	0.812035	1.94547
	54	-0.201743	-1.75562	0.812035	1.94547
	55	-0.192291	-1.77997	0.88005	1.99493
	56	-0.133451	-1.78332	0.772931	1.95047
	57	-0.133451	-1.78332	0.772931	1.95047
	58	-0.133451	-1.78332	0.772931	1.95047
	59	-0.133451	-1.78332	0.772931	1.95047
	60	-0.0925125	-1.77254	0.694526	1.906
	61	-0.0672997	-1.77476	0.660575	1.89533
	62	-0.0672997	-1.77476	0.660575	1.89533
	63	-0.0672997	-1.77476	0.660575	1.89533
	64	-0.0672997	-1.77476	0.660575	1.89533
	65	-0.0427027	-1.77667	0.627373	1.88467
	66	0.0288411	-1.75843	0.668688	1.88367
	67	0.0288411	-1.75843	0.668688	1.88367
	68	0.0288411	-1.75843	0.668688	1.88367
	69	0.0288411	-1.75843	0.668688	1.88367
	70	0.110311	-1.73779	0.715783	1.88267
	71	0.0723379	-1.75834	0.62168	1.86933
	72	0.0723379	-1.75834	0.62168	1.86933
	73	0.0723379	-1.75834	0.62168	1.86933
	74	0.0723379	-1.75834	0.62168	1.86933
	75	0.0330434	-1.78007	0.524416	1.856
	76	-0.0797861	-1.72439	0.671601	1.863
	77	-0.0797861	-1.72439	0.671601	1.863
	78	-0.0797861	-1.72439	0.671601	1.863
	79	-0.0797861	-1.72439	0.671601	1.863
	80	-0.199814	-1.66473	0.82804	1.87
	81	-0.15869	-1.71445	0.794278	1.89733
	82	-0.15869	-1.71445	0.794278	1.89733
	83	-0.15869	-1.71445	0.794278	1.89733
	84	-0.15869	-1.71445	0.794278	1.89733
	85	-0.118368	-1.76371	0.761352	1.92467
	86	-0.153832	-1.70697	0.769498	1.87933
	87	-0.153832	-1.70697	0.769498	1.87933
	88	-0.153832	-1.70697	0.769498	1.87933
	89	-0.153832	-1.70697	0.769498	1.87933
	90	-0.186894	-1.65119	0.776007	1.834
	91	-0.176187	-1.65632	0.809792	1.85233
	92	-0.176187	-1.65632	0.809792	1.85233
	93	-0.176187	-1.65632	0.809792	1.85233
	94	-0.176187	-1.65632	0.809792	1.85233
	95	-0.165537	-1.6615	0.84346	1.87067
	96	-0.199493	-1.65794	0.905915	1.9011
	97	-0.199493	-1.65794	0.905915	1.9011
	98	-0.199493	-1.65794	0.905915	1.9011
	99	-0.199493	-1.65794	0.905915	1.9011
	100	-0.239438	-1.64852	0.977703	1.93154
	101	-0.215945	-1.66478	1.0067	1.95769
	102	-0.216115	-1.66609	1.00749	1.95923
	103	-0.212805	-1.64058	0.992065	1.92923
	104	-0.217229	-1.67468	1.01269	1.96933
	105	-0.188149	-1.64663	1.01477	1.94333
	106	-0.20325	-1.72258	0.995411	2.00067
	107	-0.208261	-1.76506	1.01996	2.05
	108	-0.207991	-1.76276	1.01863	2.04733
	109	-0.205349	-1.74038	1.00569	2.02133
	110	-0.218127	-1.79447	0.971075	2.052
	111	-0.219757	-1.80788	0.978331	2.06733
	112	-0.204521	-1.68254	0.910501	1.924
Diffuser A7	1	-0.35581	-1.47913	0.903397	1.76933
	2	-0.293368	-1.45732	0.887172	1.732
	3	-0.288173	-1.43152	0.871464	1.70133
	4	-0.300933	-1.49491	0.910051	1.77667
	5	-0.24725	-1.49597	0.907961	1.76733
	6	-0.216993	-1.47216	0.824843	1.70267
	7	-0.224895	-1.52576	0.854879	1.76467
	8	-0.229398	-1.55631	0.871996	1.8
	9	-0.216823	-1.471	0.824197	1.70133
	10	-0.194593	-1.51811	0.774487	1.71533
	11	-0.186178	-1.63369	0.719335	1.79733
	12	-0.196744	-1.72641	0.760157	1.89933
	13	-0.19046	-1.67126	0.735877	1.83867
	14	-0.189631	-1.66399	0.732675	1.83067
	15	-0.173682	-1.70116	0.649884	1.82933
	16	-0.192617	-1.72242	0.6854	1.864
	17	-0.18435	-1.6485	0.655984	1.784
	18	-0.190826	-1.70641	0.679027	1.84667
	19	-0.191859	-1.71565	0.682704	1.85667
	20	-0.201119	-1.656	0.685001	1.80333
	21	-0.140849	-1.63002	0.686212	1.775
	22	-0.140849	-1.63002	0.686212	1.775
	23	-0.140849	-1.63002	0.686212	1.775
	24	-0.140849	-1.63002	0.686212	1.775
	25	-0.0902108	-1.60403	0.685404	1.74667
	26	-0.0820312	-1.64241	0.682748	1.78067
	27	-0.0820312	-1.64241	0.682748	1.78067
	28	-0.0820312	-1.64241	0.682748	1.78067
	29	-0.0820312	-1.64241	0.682748	1.78067
	30	-0.0737396	-1.68086	0.679911	1.81467
	31	-0.0731069	-1.6654	0.634613	1.784
	32	-0.0731069	-1.6654	0.634613	1.784
	33	-0.0731069	-1.6654	0.634613	1.784
	34	-0.0731069	-1.6654	0.634613	1.784
	35	-0.0723229	-1.64674	0.597656	1.75333
	36	-0.040017	-1.65915	0.551289	1.75
	37	-0.040017	-1.65915	0.551289	1.75
	38	-0.040017	-1.65915	0.551289	1.75
	39	-0.040017	-1.65915	0.551289	1.75
	40	0.000783748	-1.67565	0.492978	1.74667
	41	-0.00487696	-1.64538	0.504159	1.721
	42	-0.00487696	-1.64538	0.504159	1.721
	43	-0.00487696	-1.64538	0.504159	1.721
	44	-0.00487696	-1.64538	0.504159	1.721
	45	-0.00982092	-1.61582	0.513002	1.69533
	46	-0.0120848	-1.65644	0.620763	1.77133
	47	-0.0120848	-1.65644	0.620763	1.77133
	48	-0.0120848	-1.65644	0.620763	1.77133
	49	-0.0120848	-1.65644	0.620763	1.77133
	50	-0.014535	-1.69381	0.737189	1.84733
	51	-0.0573088	-1.62755	0.720413	1.78133
	52	-0.0573088	-1.62755	0.720413	1.78133
	53	-0.0573088	-1.62755	0.720413	1.78133
	54	-0.0573088	-1.62755	0.720413	1.78133
	55	-0.09594	-1.56184	0.702722	1.71533
	56	-0.129293	-1.6425	0.625744	1.76667
	57	-0.129293	-1.6425	0.625744	1.76667
	58	-0.129293	-1.6425	0.625744	1.76667
	59	-0.129293	-1.6425	0.625744	1.76667
	60	-0.1734	-1.73513	0.514188	1.818
	61	-0.17045	-1.73037	0.506419	1.811
	62	-0.17045	-1.73037	0.506419	1.811
	63	-0.17045	-1.73037	0.506419	1.811
	64	-0.17045	-1.73037	0.506419	1.811
	65	-0.167501	-1.7256	0.498654	1.804
	66	-0.138545	-1.73726	0.524439	1.82033
	67	-0.138545	-1.73726	0.524439	1.82033
	68	-0.138545	-1.73726	0.524439	1.82033
	69	-0.138545	-1.73726	0.524439	1.82033
	70	-0.110749	-1.74906	0.549414	1.83667
	71	-0.121496	-1.7743	0.558142	1.864
	72	-0.121496	-1.7743	0.558142	1.864
	73	-0.121496	-1.7743	0.558142	1.864
	74	-0.121496	-1.7743	0.558142	1.864
	75	-0.132925	-1.79947	0.566911	1.89133
	76	-0.135846	-1.72533	0.584191	1.827
	77	-0.135846	-1.72533	0.584191	1.827
	78	-0.135846	-1.72533	0.584191	1.827
	79	-0.135846	-1.72533	0.584191	1.827
	80	-0.137615	-1.6532	0.595809	1.76267
	81	-0.148267	-1.74865	0.708564	1.894
	82	-0.148267	-1.74865	0.708564	1.894
	83	-0.148267	-1.74865	0.708564	1.894
	84	-0.148267	-1.74865	0.708564	1.894
	85	-0.158972	-1.84038	0.830494	2.02533
	86	-0.156535	-1.87104	0.827749	2.052
	87	-0.156535	-1.87104	0.827749	2.052
	88	-0.156535	-1.87104	0.827749	2.052
	89	-0.156535	-1.87104	0.827749	2.052
	90	-0.154176	-1.90159	0.825242	2.07867
	91	-0.152717	-1.8836	0.817434	2.059
	92	-0.152717	-1.8836	0.817434	2.059
	93	-0.152717	-1.8836	0.817434	2.059
	94	-0.152717	-1.8836	0.817434	2.059
	95	-0.151258	-1.86561	0.809626	2.03933
	96	-0.152198	-1.8772	0.814655	2.052
	97	-0.152198	-1.8772	0.814655	2.052
	98	-0.152198	-1.8772	0.814655	2.052
	99	-0.152198	-1.8772	0.814655	2.052
	100	-0.153137	-1.88879	0.819684	2.06467
	101	-0.150986	-1.86226	0.808171	2.03567
	102	-0.150986	-1.86226	0.808171	2.03567
	103	-0.150986	-1.86226	0.808171	2.03567
	104	-0.150986	-1.86226	0.808171	2.03567
	105	-0.148836	-1.83573	0.796658	2.00667

## Sheet: F side
A side
	No.	Vx (m/s)	Vy (m/s)	Vz (m/s)	V (m/s)
Diffuser F1	1	0.0130096	-1.56332	0.495448	1.64
	2	0.0142682	-1.71457	0.543382	1.79867
	3	0.0134062	-1.61098	0.510553	1.69
	4	0.0131524	-1.58048	0.500886	1.658
	5	0.0131629	-1.58175	0.501289	1.65933
	6	0.0133851	-1.60844	0.509748	1.68733
	7	0.0140635	-1.68996	0.535585	1.77286
	8	0.0148817	-1.78828	0.566744	1.876
	9	0.0151355	-1.81879	0.576412	1.908
	10	0.016299	-1.9586	0.62072	2.05467
	11	-0.0200914	-1.85021	0.633648	1.95667
	12	-0.0200914	-1.85021	0.633648	1.95667
	13	-0.0200914	-1.85021	0.633648	1.95667
	14	-0.0200914	-1.85021	0.633648	1.95667
	15	-0.0533766	-1.74313	0.642867	1.85867
	16	-0.0619786	-1.76396	0.662486	1.88533
	17	-0.0619786	-1.76396	0.662486	1.88533
	18	-0.0619786	-1.76396	0.662486	1.88533
	19	-0.0619786	-1.76396	0.662486	1.88533
	20	-0.0712257	-1.78444	0.68296	1.912
	21	-0.0707979	-1.71533	0.675506	1.845
	22	-0.0707979	-1.71533	0.675506	1.845
	23	-0.0707979	-1.71533	0.675506	1.845
	24	-0.0707979	-1.71533	0.675506	1.845
	25	-0.0704911	-1.64582	0.669017	1.778
	26	-0.0778463	-1.64736	0.755789	1.81579
	27	-0.0778463	-1.64736	0.755789	1.81579
	28	-0.0778463	-1.64736	0.755789	1.81579
	29	-0.0778463	-1.64736	0.755789	1.81579
	30	-0.0850691	-1.64965	0.840919	1.85357
	31	-0.0583594	-1.66172	0.829562	1.85845
	32	-0.0583594	-1.66172	0.829562	1.85845
	33	-0.0583594	-1.66172	0.829562	1.85845
	34	-0.0583594	-1.66172	0.829562	1.85845
	35	-0.031872	-1.67372	0.818318	1.86333
	36	-0.0141143	-1.65271	0.777164	1.82667
	37	-0.0141143	-1.65271	0.777164	1.82667
	38	-0.0141143	-1.65271	0.777164	1.82667
	39	-0.0141143	-1.65271	0.777164	1.82667
	40	0.00342889	-1.63154	0.736325	1.79
	41	0.0338865	-1.61646	0.739775	1.77833
	42	0.0338865	-1.61646	0.739775	1.77833
	43	0.0338865	-1.61646	0.739775	1.77833
	44	0.0338865	-1.61646	0.739775	1.77833
	45	0.0665001	-1.60107	0.743808	1.76667
	46	0.0570666	-1.60763	0.815607	1.80467
	47	0.0570666	-1.60763	0.815607	1.80467
	48	0.0570666	-1.60763	0.815607	1.80467
	49	0.0570666	-1.60763	0.815607	1.80467
	50	0.0475302	-1.61392	0.887933	1.84267
	51	0.0568094	-1.58128	0.925307	1.83367
	52	0.0568094	-1.58128	0.925307	1.83367
	53	0.0568094	-1.58128	0.925307	1.83367
	54	0.0568094	-1.58128	0.925307	1.83367
	55	0.0661102	-1.54858	0.962776	1.82467
	56	0.0701586	-1.58768	0.901166	1.82833
	57	0.0701586	-1.58768	0.901166	1.82833
	58	0.0701586	-1.58768	0.901166	1.82833
	59	0.0701586	-1.58768	0.901166	1.82833
	60	0.073998	-1.62487	0.842947	1.832
	61	0.0659525	-1.57252	0.811931	1.771
	62	0.0659525	-1.57252	0.811931	1.771
	63	0.0659525	-1.57252	0.811931	1.771
	64	0.0659525	-1.57252	0.811931	1.771
	65	0.0580016	-1.52014	0.780964	1.71
	66	0.0129895	-1.56849	0.8156	1.76857
	67	0.0129895	-1.56849	0.8156	1.76857
	68	0.0129895	-1.56849	0.8156	1.76857
	69	0.0129895	-1.56849	0.8156	1.76857
	70	-0.0354544	-1.61658	0.850811	1.82714
	71	-0.0382905	-1.58535	0.857457	1.8029
	72	-0.0382905	-1.58535	0.857457	1.8029
	73	-0.0382905	-1.58535	0.857457	1.8029
	74	-0.0382905	-1.58535	0.857457	1.8029
	75	-0.0409875	-1.55454	0.863348	1.77867
	76	-0.0321744	-1.58484	0.779248	1.76833
	77	-0.0321744	-1.58484	0.779248	1.76833
	78	-0.0321744	-1.58484	0.779248	1.76833
	79	-0.0321744	-1.58484	0.779248	1.76833
	80	-0.0244009	-1.61038	0.704735	1.758
	81	-0.025837	-1.64577	0.758438	1.81267
	82	-0.025837	-1.64577	0.758438	1.81267
	83	-0.025837	-1.64577	0.758438	1.81267
	84	-0.025837	-1.64577	0.758438	1.81267
	85	-0.0273517	-1.67947	0.815831	1.86733
	86	-0.0255222	-1.66137	0.849015	1.86633
	87	-0.0255222	-1.66137	0.849015	1.86633
	88	-0.0255222	-1.66137	0.849015	1.86633
	89	-0.0255222	-1.66137	0.849015	1.86633
	90	-0.0235127	-1.64157	0.885535	1.86533
	91	-0.00430989	-1.67005	0.90305	1.89867
	92	-0.00430989	-1.67005	0.90305	1.89867
	93	-0.00430989	-1.67005	0.90305	1.89867
	94	-0.00430989	-1.67005	0.90305	1.89867
	95	0.0131856	-1.69861	0.920417	1.932
	96	0.0252608	-1.64688	0.911681	1.88267
	97	0.0252608	-1.64688	0.911681	1.88267
	98	0.0252608	-1.64688	0.911681	1.88267
	99	0.0252608	-1.64688	0.911681	1.88267
	100	0.0359977	-1.59605	0.901353	1.83333
	101	0.0148742	-1.60073	0.871788	1.82333
	102	0.0148742	-1.60073	0.871788	1.82333
	103	0.0148742	-1.60073	0.871788	1.82333
	104	0.0148742	-1.60073	0.871788	1.82333
	105	-0.0189875	-1.61354	0.827219	1.81333
Diffuser F2	1	0.279553	-1.66872	0.323737	1.72267
	2	0.307573	-1.83598	0.356186	1.89533
	3	0.291237	-1.73846	0.337268	1.79467
	4	0.287667	-1.71715	0.333133	1.77267
	5	0.291778	-1.74169	0.337894	1.798
	6	0.151619	-1.76995	0.468433	1.84467
	7	0.155948	-1.82049	0.481807	1.89733
	8	0.158469	-1.84991	0.489595	1.928
	9	0.161757	-1.88829	0.499752	1.968
	10	0.0445131	-1.90524	0.606685	2
	11	0.0377271	-1.89005	0.72903	2.02933
	12	0.0382477	-1.91613	0.739089	2.05733
	13	0.0374421	-1.87577	0.723521	2.014
	14	0.0376404	-1.8857	0.727353	2.02467
	15	0.0304812	-1.81015	0.809967	1.98333
	16	-0.00686243	-1.75714	0.889442	1.972
	17	-0.00682067	-1.74645	0.88403	1.96
	18	-0.0068331	-1.74963	0.885641	1.96357
	19	-0.00692756	-1.77381	0.897883	1.99071
	20	-0.0411843	-1.62884	0.923082	1.87267
	21	-0.0707005	-1.67069	0.924464	1.911
	22	-0.0707005	-1.67069	0.924464	1.911
	23	-0.0707005	-1.67069	0.924464	1.911
	24	-0.0707005	-1.67069	0.924464	1.911
	25	-0.0984923	-1.71203	0.926898	1.94933
	26	-0.0905054	-1.71299	0.896363	1.93567
	27	-0.0905054	-1.71299	0.896363	1.93567
	28	-0.0905054	-1.71299	0.896363	1.93567
	29	-0.0905054	-1.71299	0.896363	1.93567
	30	-0.0824659	-1.71404	0.865654	1.922
	31	-0.0831076	-1.70274	0.883717	1.92033
	32	-0.0831076	-1.70274	0.883717	1.92033
	33	-0.0831076	-1.70274	0.883717	1.92033
	34	-0.0831076	-1.70274	0.883717	1.92033
	35	-0.0838173	-1.6905	0.903577	1.91867
	36	-0.0834244	-1.68024	0.922767	1.91892
	37	-0.0834244	-1.68024	0.922767	1.91892
	38	-0.0834244	-1.68024	0.922767	1.91892
	39	-0.0834244	-1.68024	0.922767	1.91892
	40	-0.0829544	-1.66798	0.945597	1.91917
	41	-0.0536989	-1.67555	0.957598	1.93083
	42	-0.0536989	-1.67555	0.957598	1.93083
	43	-0.0536989	-1.67555	0.957598	1.93083
	44	-0.0536989	-1.67555	0.957598	1.93083
	45	-0.0288604	-1.68349	0.968671	1.9425
	46	-0.0163004	-1.68618	0.98575	1.95333
	47	-0.0163004	-1.68618	0.98575	1.95333
	48	-0.0163004	-1.68618	0.98575	1.95333
	49	-0.0163004	-1.68618	0.98575	1.95333
	50	-0.00335483	-1.68866	1.00318	1.96417
	51	-0.00390364	-1.66551	0.985191	1.93508
	52	-0.00390364	-1.66551	0.985191	1.93508
	53	-0.00390364	-1.66551	0.985191	1.93508
	54	-0.00390364	-1.66551	0.985191	1.93508
	55	-0.00440135	-1.6422	0.967466	1.906
	56	0.000490774	-1.66581	0.93746	1.91185
	57	0.000490774	-1.66581	0.93746	1.91185
	58	0.000490774	-1.66581	0.93746	1.91185
	59	0.000490774	-1.66581	0.93746	1.91185
	60	0.00523843	-1.68887	0.908424	1.91769
	61	-0.0373504	-1.71961	0.866974	1.92731
	62	-0.0373504	-1.71961	0.866974	1.92731
	63	-0.0373504	-1.71961	0.866974	1.92731
	64	-0.0373504	-1.71961	0.866974	1.92731
	65	-0.080114	-1.75045	0.825336	1.93692
	66	-0.0397515	-1.77166	0.822763	1.95429
	67	-0.0397515	-1.77166	0.822763	1.95429
	68	-0.0397515	-1.77166	0.822763	1.95429
	69	-0.0397515	-1.77166	0.822763	1.95429
	70	0.00482178	-1.79344	0.819167	1.97167
	71	-0.00634575	-1.81808	0.781022	1.97929
	72	-0.00634575	-1.81808	0.781022	1.97929
	73	-0.00634575	-1.81808	0.781022	1.97929
	74	-0.00634575	-1.81808	0.781022	1.97929
	75	-0.0176933	-1.84301	0.742211	1.98692
	76	-0.0118925	-1.81353	0.741837	1.95946
	77	-0.0118925	-1.81353	0.741837	1.95946
	78	-0.0118925	-1.81353	0.741837	1.95946
	79	-0.0118925	-1.81353	0.741837	1.95946
	80	-0.00623458	-1.78415	0.741208	1.932
	81	-0.050512	-1.71644	0.869596	1.93133
	82	-0.050512	-1.71644	0.869596	1.93133
	83	-0.050512	-1.71644	0.869596	1.93133
	84	-0.050512	-1.71644	0.869596	1.93133
	85	-0.0988428	-1.64259	1.00976	1.93067
	86	-0.107865	-1.69335	0.923551	1.93426
	87	-0.107865	-1.69335	0.923551	1.93426
	88	-0.107865	-1.69335	0.923551	1.93426
	89	-0.107865	-1.69335	0.923551	1.93426
	90	-0.116265	-1.74075	0.84355	1.93786
	91	-0.131273	-1.75629	0.868054	1.9636
	92	-0.131273	-1.75629	0.868054	1.9636
	93	-0.131273	-1.75629	0.868054	1.9636
	94	-0.131273	-1.75629	0.868054	1.9636
	95	-0.146162	-1.7719	0.892441	1.98933
	96	-0.13289	-1.76457	0.870432	1.97217
	97	-0.13289	-1.76457	0.870432	1.97217
	98	-0.13289	-1.76457	0.870432	1.97217
	99	-0.13289	-1.76457	0.870432	1.97217
	100	-0.119696	-1.75719	0.848517	1.955
	101	-0.040751	-1.75464	0.831627	1.94383
	102	-0.040751	-1.75464	0.831627	1.94383
	103	-0.040751	-1.75464	0.831627	1.94383
	104	-0.040751	-1.75464	0.831627	1.94383
	105	0.0388221	-1.75216	0.81464	1.93267
	106	-0.0357874	-1.71643	0.879536	1.93133
	107	-0.0357874	-1.71643	0.879536	1.93133
	108	-0.0357874	-1.71643	0.879536	1.93133
	109	-0.0357874	-1.71643	0.879536	1.93133
	110	-0.0968382	-1.68698	0.932532	1.93
	111	-0.0968382	-1.68698	0.932532	1.93
	112	-0.0968382	-1.68698	0.932532	1.93
	113	-0.0968382	-1.68698	0.932532	1.93
Diffuser F3	1	0.162475	-1.37995	0.549759	1.49429
	2	0.155602	-1.38332	0.483151	1.47467
	3	0.150818	-1.34079	0.468298	1.42933
	4	0.170233	-1.51339	0.528583	1.61333
	5	0.165975	-1.53506	0.473566	1.615
	6	0.168458	-1.51693	0.586169	1.63867
	7	0.170034	-1.53112	0.591654	1.654
	8	0.169696	-1.52808	0.590478	1.65071
	9	0.172501	-1.55334	0.600239	1.678
	10	0.17214	-1.51017	0.70144	1.674
	11	0.166115	-1.493	0.693739	1.65467
	12	0.165245	-1.48518	0.690105	1.646
	13	0.167439	-1.5049	0.699269	1.66786
	14	0.167809	-1.50822	0.700813	1.67154
	15	0.162452	-1.49598	0.695401	1.65769
	16	0.173109	-1.48621	0.657259	1.63467
	17	0.177095	-1.52043	0.672394	1.67231
	18	0.176362	-1.51414	0.66961	1.66538
	19	0.174521	-1.49833	0.66262	1.648
	20	0.199373	-1.5814	0.65584	1.72357
	21	0.202819	-1.57449	0.656765	1.718
	22	0.201559	-1.56471	0.652687	1.70733
	23	0.203476	-1.5796	0.658894	1.72357
	24	0.201638	-1.56533	0.652942	1.708
	25	0.2067	-1.57149	0.659261	1.71667
	26	0.212825	-1.56454	0.656481	1.71
	27	0.211415	-1.55417	0.65213	1.69867
	28	0.213687	-1.57087	0.659139	1.71692
	29	0.212742	-1.56393	0.656225	1.70933
	30	0.218824	-1.55512	0.652671	1.70067
	31	0.220836	-1.55099	0.631516	1.68923
	32	0.222243	-1.56088	0.635542	1.7
	33	0.224509	-1.5768	0.642022	1.71733
	34	0.221721	-1.55721	0.634047	1.696
	35	0.223023	-1.54823	0.611059	1.67933
	36	0.195036	-1.57174	0.586386	1.68933
	37	0.194035	-1.56368	0.583378	1.68067
	38	0.195645	-1.57666	0.588219	1.69462
	39	0.19542	-1.57484	0.587543	1.69267
	40	0.167657	-1.56075	0.554133	1.66467
	41	0.174993	-1.5947	0.576123	1.70462
	42	0.176915	-1.61221	0.582449	1.72333
	43	0.173933	-1.58503	0.572632	1.69429
	44	0.173566	-1.58169	0.571425	1.69071
	45	0.178222	-1.58576	0.584233	1.69933
	46	0.192836	-1.57386	0.584487	1.69
	47	0.193673	-1.58069	0.587024	1.69733
	48	0.201149	-1.64171	0.609685	1.76286
	49	0.200823	-1.63905	0.608697	1.76
	50	0.213066	-1.61063	0.602716	1.73286
	51	0.219752	-1.62501	0.642379	1.76143
	52	0.220822	-1.63292	0.645505	1.77
	53	0.219574	-1.62369	0.641858	1.76
	54	0.220246	-1.62866	0.643822	1.76538
	55	0.222558	-1.61037	0.670884	1.75867
	56	0.149101	-1.60036	0.71788	1.76214
	57	0.152304	-1.63474	0.733302	1.8
	58	0.14759	-1.58414	0.710605	1.74429
	59	0.14892	-1.59841	0.717007	1.76
	60	0.0877808	-1.5923	0.757267	1.76538
	61	0.0536149	-1.5711	0.803472	1.76643
	62	0.0537436	-1.57487	0.8054	1.77067
	63	0.0541685	-1.58732	0.811768	1.78467
	64	0.0541685	-1.58732	0.811768	1.78467
	65	0.0226908	-1.60116	0.873349	1.824
	66	0.0208611	-1.59926	0.849963	1.81133
	67	0.0212066	-1.62575	0.86404	1.84133
	68	0.0210991	-1.61751	0.859661	1.832
	69	0.0211452	-1.62104	0.861538	1.836
	70	0.0188131	-1.58658	0.819884	1.786
	71	0.0971825	-1.64943	0.835164	1.85308
	72	0.0959319	-1.6282	0.824417	1.82923
	73	0.0965666	-1.63897	0.829871	1.84133
	74	0.0976854	-1.65796	0.839486	1.86267
	75	0.175557	-1.65235	0.819319	1.85267
	76	0.166088	-1.63703	0.813842	1.83571
	77	0.166656	-1.64263	0.816629	1.842
	78	0.168076	-1.65662	0.823586	1.85769
	79	0.167456	-1.65051	0.820545	1.85083
	80	0.157516	-1.63651	0.81589	1.83538
	81	0.16124	-1.67808	0.790773	1.8625
	82	0.159653	-1.66156	0.782989	1.84417
	83	0.16124	-1.67808	0.790773	1.8625
	84	0.161024	-1.67583	0.789712	1.86
	85	0.161561	-1.68417	0.750216	1.85077
	86	0.141154	-1.64099	0.760922	1.81462
	87	0.143284	-1.66575	0.772406	1.842
	88	0.139128	-1.61743	0.750001	1.78857
	89	0.141573	-1.64586	0.76318	1.82
	90	0.11139	-1.46947	0.709026	1.63538
	91	0.101932	-1.48912	0.71931	1.65692
	92	0.102941	-1.50387	0.726434	1.67333
	93	0.100748	-1.47184	0.710962	1.63769
	94	0.103925	-1.51825	0.73338	1.68933
	95	0.0921496	-1.50356	0.727075	1.67267
	96	0.131644	-1.46254	0.750409	1.65
	97	0.133793	-1.4864	0.762653	1.67692
	98	0.132655	-1.47376	0.756169	1.66267
	99	0.135155	-1.50154	0.77042	1.694
	100	0.176942	-1.49651	0.81125	1.71143
	101	0.182628	-1.51468	0.817052	1.73067
	102	0.183542	-1.52226	0.821143	1.73933
	103	0.185371	-1.53743	0.829326	1.75667
	104	0.183683	-1.52343	0.821773	1.74067
	105	0.191739	-1.56039	0.837593	1.78133
	106	0.0752377	-1.62896	0.751102	1.80231
	107	0.075529	-1.63527	0.75401	1.80929
	108	0.0753501	-1.63139	0.752224	1.805
	109	0.0779351	-1.68736	0.77803	1.86692
	110	-0.0404887	-1.7284	0.678204	1.85714
	111	-0.0408126	-1.74223	0.68363	1.872
	112	-0.0419765	-1.79191	0.703125	1.92538
	113	-0.0431049	-1.84009	0.722027	1.97714		Repeated measurement
Diffuser F4	1	0.328587	-1.70846	0.421057	1.79		1.73333
	2	0.301403	-1.69002	0.496821	1.78867		1.74267
	3	0.303537	-1.70199	0.500339	1.80133		1.72067
	4	0.289569	-1.73551	0.577969	1.852		1.774
	5	0.264378	-1.73687	0.599548	1.85667		1.77467
	6	0.262574	-1.72502	0.595457	1.844		1.84067
	7	0.232586	-1.69948	0.608335	1.82		1.77667
	8	0.181602	-1.64391	0.689186	1.79467		1.79467
	9	0.182276	-1.65002	0.691746	1.80133		1.80133
	10	0.137323	-1.61318	0.771251	1.79333		1.79333
	11	0.124738	-1.58366	0.832134	1.79467		1.79467
	12	0.127981	-1.62484	0.853772	1.84133		1.84133
	13	0.112476	-1.56206	0.899421	1.806		1.806
	14	0.0826596	-1.58276	0.880137	1.81333		1.81333
	15	0.0837232	-1.60313	0.891462	1.83667		1.83667
	16	0.0539688	-1.60293	0.861705	1.82067		1.82067
	17	0.00046048	-1.67103	0.882581	1.89067		1.89067
	18	0.000467949	-1.69814	0.896896	1.92133		1.92133
	19	0.000468111	-1.69873	0.897207	1.922		1.922
	20	-0.0561309	-1.68705	0.875083	1.90133		1.90133
	21	-0.0297012	-1.7312	0.900862	1.952		1.952
	22	-0.0300157	-1.74953	0.910399	1.97267		1.97267
	23	-0.00023665	-1.75752	0.917651	1.98267		1.98267
	24	-0.0145416	-1.75817	0.936086	1.992		1.992
	25	-0.0146	-1.76523	0.939845	2		2
	26	-0.0277969	-1.74697	0.947008	1.98733		1.98733
	27	-0.0223697	-1.79289	0.926353	2.01867		2.01867
	28	-0.0221407	-1.77454	0.916869	1.998		1.998
	29	-0.0152192	-1.78454	0.869914	1.98533		1.98533
	30	-0.0143321	-1.80932	0.911123	2.026		2.026
	31	-0.014634	-1.84742	0.930311	2.06867		2.06867
	32	-0.0130987	-1.79172	0.931271	2.01933		2.01933
	33	-0.00735072	-1.85679	0.951985	2.08667		2.08667
	34	-0.00729671	-1.84315	0.94499	2.07133		2.07133
	35	-0.00129794	-1.83105	0.926256	2.052		2.052
	36	-0.024834	-1.84827	0.944696	2.076		2.076
	37	-0.0244671	-1.82097	0.930741	2.04533		2.04533
	38	-0.0248659	-1.85065	0.945909	2.07867		2.07867
	39	-0.024523	-1.82512	0.932864	2.05		2.05
	40	-0.047686	-1.86026	0.960207	2.094		2.094
	41	-0.035329	-1.83083	1.0033	2.08867		2.05733
	42	-0.0358477	-1.85771	1.01803	2.11933		2.026
	43	-0.0236056	-1.81559	1.05237	2.09867		2.076
	44	-0.0358301	-1.84385	1.03982	2.11733		2.06933
	45	-0.0327954	-1.68768	0.951754	1.938		2.09
	46	-0.0468238	-1.80428	0.988813	2.058		2.07133
	47	-0.0197573	-1.76622	1.03082	2.046		2.05533
	48	-0.0198346	-1.77313	1.03485	2.054		2.02
	49	0.00569064	-1.68716	1.04389	1.984		2.01467
	50	-0.00680994	-1.76177	0.945085	2.00333		2.07867
	51	-0.00690965	-1.78756	0.958924	2.03267		2.10067
	52	-0.0202586	-1.83961	0.837382	2.02133		2.05933
	53	-0.039949	-1.83078	0.889781	2.03667		2.03933
	54	-0.0402105	-1.84276	0.895606	2.05		2.08667
	55	-0.0591775	-1.81265	0.936923	2.04133		2.05733
	56	-0.035063	-1.8782	0.906566	2.08667		2.076
	57	-0.0347829	-1.8632	0.899325	2.07		2.058
	58	-0.0122963	-1.84156	0.834849	2.022		2.03333
	59	-0.0184893	-1.86801	0.810617	2.03667		2.04333
	60	-0.0182956	-1.84845	0.802126	2.01533		2.07867
	61	-0.0243905	-1.87828	0.780153	2.034		2.082
	62	-0.0318017	-1.84111	0.782057	2.00067		2.05133
	63	-0.032215	-1.86504	0.792221	2.02667		2.03667
	64	-0.0404553	-1.84836	0.803867	2.016		1.99333
	65	-0.0536182	-1.8457	0.813986	2.018		1.988
	66	-0.0531399	-1.82924	0.806726	2		1.99467
	67	-0.0656993	-1.84773	0.825131	2.02467		2.02733
	68	-0.0631392	-1.86328	0.797438	2.028		2.02067
	69	-0.0628694	-1.85532	0.79403	2.01933		2.02733
	70	-0.0606986	-1.88892	0.771588	2.04133		2.02667
	71	-0.0571594	-1.89199	0.774908	2.04533		2.00333
	72	-0.0569358	-1.88459	0.771877	2.03733		2.04333
	73	-0.0533707	-1.88213	0.772854	2.03533		2.01214
	74	-0.0675425	-1.81248	0.889292	2.02467		2.03733
	75	-0.0679205	-1.82262	0.89427	2.036		1.94667
	76	-0.066853	-1.79397	0.880214	2.004		2.05071
	77	-0.0825288	-1.75391	1.01478	2.028		2.044
	78	-0.0758098	-1.74502	0.997239	2.01133		2.00333
	79	-0.077418	-1.78203	1.01839	2.054		2.014
	80	-0.0714724	-1.78807	1.00963	2.05467		2.02867
	81	-0.0851911	-1.82252	0.942946	2.05533		2.006
	82	-0.0848871	-1.81601	0.939582	2.048		1.954
	83	-0.10105	-1.87376	0.875489	2.07067		1.966
	84	-0.0593013	-1.81088	0.97722	2.062		1.95133
	85	-0.0593205	-1.81146	0.977536	2.06267		1.96133
	86	-0.0227492	-1.77732	1.08029	2.08		1.98067
	87	-0.0392812	-1.75875	1.05226	2.05		2.022
	88	-0.0400987	-1.79536	1.07416	2.09267		2.02667
	89	-0.0566842	-1.76605	1.03941	2.05		2.03867
	90	-0.0614323	-1.73652	0.99679	2.00333		1.96
	91	-0.0627816	-1.77466	1.01868	2.04733		2.00049
	92	-0.067614	-1.75557	0.983323	2.01333		1.994
	93	-0.0890832	-1.76183	0.9001	1.982		2.05143
	94	-0.0906413	-1.79264	0.915843	2.01667		2.035
	95	-0.0876449	-1.73338	0.885568	1.95		2.06667
	96	-0.0931583	-1.84242	0.941275	2.07267		2.07867
	97	-0.114081	-1.8391	0.853411	2.03067		2.08867
	98	-0.143691	-1.90505	0.736422	2.052		2.09
	99	-0.142337	-1.8871	0.729484	2.03267		2.14533
	100	-0.172013	-1.95533	0.613989	2.05667		2.14667
	101	-0.186079	-1.73886	0.549325	1.83333		2.14667
	102	-0.226882	-2.12014	0.669777	2.23533		2.25667
	103	-0.263346	-2.08798	0.663604	2.20667		2.17333
	104	-0.258573	-2.05013	0.651575	2.16667		2.138
	105	-0.218792	-1.73473	0.551333	1.83333		1.86867
Diffuser F5	1	0.228618	-1.52892	0.121292	1.55067
	2	0.121021	-1.55721	0.384131	1.63067
	3	0.122456	-1.57567	0.388685	1.65
	4	0.120915	-1.55584	0.383793	1.62923
	5	0.0171031	-1.51626	0.608778	1.634
	6	-0.0227983	-1.53336	0.614819	1.65267
	7	-0.02278	-1.53212	0.614323	1.65133
	8	-0.0228811	-1.53892	0.617051	1.65867
	9	-0.0230276	-1.54878	0.621001	1.66929
	10	-0.0639509	-1.56096	0.62505	1.68267
	11	-0.0277176	-1.56175	0.622862	1.682
	12	-0.0283878	-1.59951	0.637922	1.72267
	13	-0.0288162	-1.62366	0.64755	1.74867
	14	-0.0287833	-1.6218	0.646809	1.74667
	15	0.00908909	-1.65797	0.658571	1.784
	16	-0.0209226	-1.63143	0.716347	1.78333
	17	-0.0209226	-1.63143	0.716347	1.78333
	18	-0.0209918	-1.63682	0.718716	1.78923
	19	-0.0207211	-1.61571	0.709446	1.76615
	20	-0.0526524	-1.62128	0.784772	1.802
	21	-0.0302981	-1.5744	0.763168	1.75
	22	-0.0310945	-1.61578	0.783229	1.796
	23	-0.0311984	-1.62118	0.785845	1.802
	24	-0.0309783	-1.60974	0.780301	1.78929
	25	-0.0112988	-1.74523	0.847141	1.94
	26	-0.0318098	-1.74196	0.854674	1.94071
	27	-0.0314	-1.71952	0.843665	1.91571
	28	-0.0313883	-1.71888	0.84335	1.915
	29	-0.0315873	-1.72978	0.848698	1.92714
	30	-0.0519598	-1.75098	0.867979	1.955
	31	-0.0317985	-1.76309	0.855218	1.96
	32	-0.0319955	-1.77401	0.860517	1.97214
	33	-0.0311063	-1.72471	0.836601	1.91733
	34	-0.0313983	-1.7409	0.844455	1.93533
	35	-0.0106465	-1.75232	0.830835	1.93933
	36	0.0122345	-1.76538	0.786403	1.93333
	37	0.0124538	-1.79704	0.800504	1.968
	38	0.0119265	-1.72094	0.766607	1.88467
	39	0.0127238	-1.836	0.817859	2.01067
	40	0.0360363	-1.82519	0.76148	1.978
	41	0.119893	-1.88628	0.581083	1.98867
	42	0.118526	-1.86478	0.57446	1.966
	43	0.112135	-1.76424	0.543487	1.86
	44	0.116315	-1.83	0.563746	1.92933
	45	0.197884	-1.8666	0.377623	1.91467
	46	0.109995	-1.86158	0.501469	1.93667
	47	0.11079	-1.87504	0.505094	1.95067
	48	0.10814	-1.83018	0.493011	1.904
	49	0.10795	-1.82698	0.492148	1.90067
	50	0.0251351	-1.79701	0.599911	1.89467
	51	0.0303016	-1.79751	0.64383	1.91
	52	0.031042	-1.84143	0.65956	1.95667
	53	0.0312006	-1.85084	0.662931	1.96667
	54	0.0304814	-1.80818	0.64765	1.92133
	55	0.0358597	-1.83504	0.699036	1.964
	56	0.00471226	-1.82897	0.630661	1.936
	57	0.00463113	-1.79748	0.619802	1.90267
	58	0.0046506	-1.80504	0.622408	1.91067
	59	0.00474796	-1.84282	0.635438	1.95067
	60	-0.0289944	-1.85802	0.568752	1.94333
	61	-0.032643	-1.75646	0.564254	1.84533
	62	-0.0345063	-1.85672	0.596462	1.95067
	63	-0.0349073	-1.87829	0.603392	1.97333
	64	-0.0351549	-1.89162	0.607673	1.98733
	65	-0.039735	-1.84215	0.619722	1.944
	66	-0.0657218	-1.85395	0.627886	1.95867
	67	-0.066035	-1.86278	0.630878	1.968
	68	-0.0646928	-1.82492	0.618055	1.928
	69	-0.0646481	-1.82366	0.617628	1.92667
	70	-0.092163	-1.85939	0.634004	1.96667
	71	-0.0962898	-1.83351	0.61607	1.93667
	72	-0.0947982	-1.80511	0.606527	1.90667
	73	-0.095544	-1.81931	0.611299	1.92167
	74	-0.0962898	-1.83351	0.61607	1.93667
	75	-0.100698	-1.81485	0.600724	1.91433
	76	-0.109049	-1.77247	0.649746	1.892
	77	-0.108876	-1.76966	0.648716	1.889
	78	-0.108703	-1.76685	0.647686	1.886
	79	-0.10878	-1.7681	0.648144	1.88733
	80	-0.119092	-1.74656	0.708803	1.88867
	81	-0.128805	-1.74552	0.717497	1.89167
	82	-0.129009	-1.74829	0.718634	1.89467
	83	-0.128396	-1.73999	0.715221	1.88567
	84	-0.127783	-1.73168	0.711807	1.87667
	85	-0.135178	-1.70307	0.708904	1.84967
	86	-0.141687	-1.6558	0.746499	1.82267
	87	-0.141843	-1.65761	0.747318	1.82467
	88	-0.141998	-1.65943	0.748137	1.82667
	89	-0.143605	-1.67821	0.756601	1.84733
	90	-0.15464	-1.67207	0.818354	1.868
	91	-0.146108	-1.68313	0.78518	1.86333
	92	-0.145742	-1.67892	0.783214	1.85867
	93	-0.14433	-1.66266	0.775629	1.84067
	94	-0.142919	-1.6464	0.768044	1.82267
	95	-0.137205	-1.68439	0.749371	1.84867
	96	-0.121655	-1.71586	0.744861	1.87467
	97	-0.124208	-1.75186	0.76049	1.914
	98	-0.12676	-1.78786	0.776118	1.95333
	99	-0.128426	-1.81135	0.786316	1.979
	100	-0.111351	-1.84318	0.780379	2.00467
	101	-0.0977336	-1.84697	0.754352	1.99767
	102	-0.0973912	-1.84049	0.751709	1.99067
	103	-0.099022	-1.87131	0.764296	2.024
	104	-0.100653	-1.90213	0.776883	2.05733
	105	-0.0876791	-1.91345	0.754418	2.05867
	106	-0.0478084	-1.95173	0.645884	2.06
	107	-0.0489842	-1.99974	0.661769	2.11067
	108	-0.0501601	-2.04774	0.677655	2.16133
	109	-0.0479167	-1.95616	0.647347	2.06467
	110	-0.00744789	-1.90004	0.512663	1.968
	111	-0.00744789	-1.90004	0.512663	1.968
	112	-0.00744789	-1.90004	0.512663	1.968
	113	-0.00744789	-1.90004	0.512663	1.968
Diffuser F6	1	0.526668	-1.64256	0.473229	1.78867
	2	0.346559	-1.66556	0.527823	1.79067
	3	0.338095	-1.62488	0.514932	1.74693
	4	0.343591	-1.6513	0.523304	1.77533
	5	0.171502	-1.62826	0.558806	1.73
	6	0.205858	-1.64924	0.457037	1.72667
	7	0.213726	-1.71228	0.474507	1.79267
	8	0.206414	-1.6537	0.458272	1.73133
	9	0.213726	-1.71228	0.474507	1.79267
	10	0.241464	-1.71355	0.381363	1.772
	11	0.169618	-1.63818	0.44656	1.70867
	12	0.173324	-1.67397	0.456317	1.746
	13	0.176633	-1.70593	0.465029	1.77933
	14	0.177625	-1.71552	0.467643	1.78933
	15	0.127921	-1.69692	0.526541	1.78133
	16	0.0838608	-1.63053	0.488222	1.70467
	17	0.0876652	-1.7045	0.510371	1.782
	18	0.0846151	-1.6452	0.492614	1.72
	19	0.085599	-1.66433	0.498342	1.74
	20	0.0450793	-1.70476	0.491123	1.77467
	21	0.0553831	-1.69298	0.509485	1.769
	22	0.0553831	-1.69298	0.509485	1.769
	23	0.0553831	-1.69298	0.509485	1.769
	24	0.0553831	-1.69298	0.509485	1.769
	25	0.0653532	-1.6814	0.527211	1.76333
	26	0.0757837	-1.68505	0.54272	1.772
	27	0.0757837	-1.68505	0.54272	1.772
	28	0.0757837	-1.68505	0.54272	1.772
	29	0.0757837	-1.68505	0.54272	1.772
	30	0.0866264	-1.68851	0.558756	1.78067
	31	0.0882096	-1.67867	0.595257	1.78367
	32	0.0882096	-1.67867	0.595257	1.78367
	33	0.0882096	-1.67867	0.595257	1.78367
	34	0.0882096	-1.67867	0.595257	1.78367
	35	0.0898087	-1.66868	0.632152	1.78667
	36	0.110681	-1.64245	0.586451	1.748
	37	0.110681	-1.64245	0.586451	1.748
	38	0.110681	-1.64245	0.586451	1.748
	39	0.110681	-1.64245	0.586451	1.748
	40	0.131219	-1.61607	0.541219	1.70933
	41	0.125169	-1.64826	0.573095	1.74967
	42	0.125169	-1.64826	0.573095	1.74967
	43	0.125169	-1.64826	0.573095	1.74967
	44	0.125169	-1.64826	0.573095	1.74967
	45	0.118886	-1.68029	0.60546	1.79
	46	0.118417	-1.62486	0.596584	1.735
	47	0.118417	-1.62486	0.596584	1.735
	48	0.118417	-1.62486	0.596584	1.735
	49	0.118417	-1.62486	0.596584	1.735
	50	0.117813	-1.56959	0.587297	1.68
	51	0.103929	-1.70202	0.642385	1.82233
	52	0.103929	-1.70202	0.642385	1.82233
	53	0.103929	-1.70202	0.642385	1.82233
	54	0.103929	-1.70202	0.642385	1.82233
	55	0.0879586	-1.83441	0.69794	1.96467
	56	0.0992112	-1.83884	0.624239	1.94567
	57	0.0992112	-1.83884	0.624239	1.94567
	58	0.0992112	-1.83884	0.624239	1.94567
	59	0.0992112	-1.83884	0.624239	1.94567
	60	0.109376	-1.84128	0.556553	1.92667
	61	0.12076	-1.84838	0.536743	1.92867
	62	0.12076	-1.84838	0.536743	1.92867
	63	0.12076	-1.84838	0.536743	1.92867
	64	0.12076	-1.84838	0.536743	1.92867
	65	0.132069	-1.85544	0.517066	1.93067
	66	0.120586	-1.88166	0.518877	1.95567
	67	0.120586	-1.88166	0.518877	1.95567
	68	0.120586	-1.88166	0.518877	1.95567
	69	0.120586	-1.88166	0.518877	1.95567
	70	0.108711	-1.90795	0.520542	1.98067
	71	0.108329	-1.90079	0.530113	1.97633
	72	0.108329	-1.90079	0.530113	1.97633
	73	0.108329	-1.90079	0.530113	1.97633
	74	0.108329	-1.90079	0.530113	1.97633
	75	0.107945	-1.89361	0.539805	1.972
	76	0.08316	-1.89679	0.642425	2.007
	77	0.08316	-1.89679	0.642425	2.007
	78	0.08316	-1.89679	0.642425	2.007
	79	0.08316	-1.89679	0.642425	2.007
	80	0.0566582	-1.89803	0.751028	2.042
	81	0.0745907	-1.90685	0.747764	2.04967
	82	0.0745907	-1.90685	0.747764	2.04967
	83	0.0745907	-1.90685	0.747764	2.04967
	84	0.0745907	-1.90685	0.747764	2.04967
	85	0.0920436	-1.91563	0.744664	2.05733
	86	0.0824304	-1.90935	0.738835	2.049
	87	0.0824304	-1.90935	0.738835	2.049
	88	0.0824304	-1.90935	0.738835	2.049
	89	0.0824304	-1.90935	0.738835	2.049
	90	0.0731017	-1.90304	0.733092	2.04067
	91	0.0774959	-1.77444	0.697724	1.90833
	92	0.0774959	-1.77444	0.697724	1.90833
	93	0.0774959	-1.77444	0.697724	1.90833
	94	0.0774959	-1.77444	0.697724	1.90833
	95	0.0805729	-1.6466	0.660601	1.776
	96	0.0735805	-1.78917	0.651963	1.90667
	97	0.0735805	-1.78917	0.651963	1.90667
	98	0.0735805	-1.78917	0.651963	1.90667
	99	0.0735805	-1.78917	0.651963	1.90667
	100	0.065263	-1.93394	0.637454	2.03733
	101	0.059113	-1.91735	0.625435	2.01767
	102	0.059113	-1.91735	0.625435	2.01767
	103	0.059113	-1.91735	0.625435	2.01767
	104	0.059113	-1.91735	0.625435	2.01767
	105	0.0532925	-1.90065	0.613765	1.998
	106	0.00913529	-1.935	0.552596	2.014
	107	0.00913529	-1.935	0.552596	2.014
	108	0.00913529	-1.935	0.552596	2.014
	109	0.00913529	-1.935	0.552596	2.014
	110	-0.0344596	-1.96911	0.49226	2.03
	111	-0.0344596	-1.96911	0.49226	2.03
	112	-0.0344596	-1.96911	0.49226	2.03
Diffuser F7	1	0.457135	-1.66224	0.553196	1.81053
	2	0.319622	-1.70986	0.527512	1.822
	3	0.326054	-1.74427	0.538128	1.85867
	4	0.317634	-1.69923	0.524231	1.81067
	5	0.234331	-1.85254	0.540655	1.944
	6	0.238775	-1.91483	0.513414	1.99733
	7	0.242919	-1.94807	0.522325	2.032
	8	0.243557	-1.95318	0.523696	2.03733
	9	0.243557	-1.95318	0.523696	2.03733
	10	0.240171	-1.95734	0.4732	2.028
	11	0.235132	-1.92268	0.437654	1.986
	12	0.22937	-1.87557	0.426929	1.93733
	13	0.231659	-1.89428	0.43119	1.95667
	14	0.228502	-1.86847	0.425313	1.93
	15	0.228363	-1.87328	0.40124	1.92933
	16	0.183612	-1.89308	0.504154	1.97067
	17	0.18032	-1.85913	0.495115	1.93533
	18	0.184668	-1.90396	0.507054	1.982
	19	0.186034	-1.91805	0.510806	1.99667
	20	0.135505	-1.90166	0.608827	2.00133
	21	0.131655	-1.90654	0.641219	2.016
	22	0.131655	-1.90654	0.641219	2.016
	23	0.131655	-1.90654	0.641219	2.016
	24	0.131655	-1.90654	0.641219	2.016
	25	0.127818	-1.91145	0.673532	2.03067
	26	0.148183	-1.89257	0.719035	2.03067
	27	0.148183	-1.89257	0.719035	2.03067
	28	0.148183	-1.89257	0.719035	2.03067
	29	0.148183	-1.89257	0.719035	2.03067
	30	0.168479	-1.87375	0.764383	2.03067
	31	0.186211	-1.83284	0.791609	2.00567
	32	0.186211	-1.83284	0.791609	2.00567
	33	0.186211	-1.83284	0.791609	2.00567
	34	0.186211	-1.83284	0.791609	2.00567
	35	0.203661	-1.79218	0.818313	1.98067
	36	0.232473	-1.80988	0.769755	1.98133
	37	0.232473	-1.80988	0.769755	1.98133
	38	0.232473	-1.80988	0.769755	1.98133
	39	0.232473	-1.80988	0.769755	1.98133
	40	0.260879	-1.82733	0.721888	1.982
	41	0.274461	-1.82513	0.760784	1.99667
	42	0.274461	-1.82513	0.760784	1.99667
	43	0.274461	-1.82513	0.760784	1.99667
	44	0.274461	-1.82513	0.760784	1.99667
	45	0.287902	-1.82311	0.799277	2.01133
	46	0.258641	-1.81629	0.800884	2.002
	47	0.258641	-1.81629	0.800884	2.002
	48	0.258641	-1.81629	0.800884	2.002
	49	0.258641	-1.81629	0.800884	2.002
	50	0.230318	-1.80941	0.802312	1.99267
	51	0.214591	-1.81058	0.798914	1.99067
	52	0.214591	-1.81058	0.798914	1.99067
	53	0.214591	-1.81058	0.798914	1.99067
	54	0.214591	-1.81058	0.798914	1.99067
	55	0.199216	-1.81168	0.795575	1.98867
	56	0.192482	-1.80759	0.855894	2.01
	57	0.192482	-1.80759	0.855894	2.01
	58	0.192482	-1.80759	0.855894	2.01
	59	0.192482	-1.80759	0.855894	2.01
	60	0.186129	-1.80452	0.913994	2.03133
	61	0.175855	-1.79656	0.914641	2.02367
	62	0.175855	-1.79656	0.914641	2.02367
	63	0.175855	-1.79656	0.914641	2.02367
	64	0.175855	-1.79656	0.914641	2.02367
	65	0.166095	-1.78866	0.915068	2.016
	66	0.168699	-1.80328	0.925673	2.034
	67	0.168699	-1.80328	0.925673	2.034
	68	0.168699	-1.80328	0.925673	2.034
	69	0.168699	-1.80328	0.925673	2.034
	70	0.171283	-1.81792	0.936236	2.052
	71	0.172783	-1.81894	0.922859	2.047
	72	0.172783	-1.81894	0.922859	2.047
	73	0.172783	-1.81894	0.922859	2.047
	74	0.172783	-1.81894	0.922859	2.047
	75	0.174272	-1.81992	0.909543	2.042
	76	0.188867	-1.86709	0.816543	2.04933
	77	0.188867	-1.86709	0.816543	2.04933
	78	0.188867	-1.86709	0.816543	2.04933
	79	0.188867	-1.86709	0.816543	2.04933
	80	0.203858	-1.9154	0.720818	2.05667
	81	0.196885	-1.90069	0.78427	2.06667
	82	0.196885	-1.90069	0.78427	2.06667
	83	0.196885	-1.90069	0.78427	2.06667
	84	0.196885	-1.90069	0.78427	2.06667
	85	0.18904	-1.88335	0.85428	2.07667
	86	0.178627	-1.81871	0.950955	2.06333
	87	0.178627	-1.81871	0.950955	2.06333
	88	0.178627	-1.81871	0.950955	2.06333
	89	0.178627	-1.81871	0.950955	2.06333
	90	0.168235	-1.75419	1.04739	2.05
	91	0.163978	-1.74483	1.02233	2.029
	92	0.163978	-1.74483	1.02233	2.029
	93	0.163978	-1.74483	1.02233	2.029
	94	0.163978	-1.74483	1.02233	2.029
	95	0.159191	-1.73727	0.994288	2.008
	96	0.0245436	-1.67443	0.943003	1.92633
	97	0.0245436	-1.67443	0.943003	1.92633
	98	0.0245436	-1.67443	0.943003	1.92633
	99	0.0245436	-1.67443	0.943003	1.92633
	100	-0.10356	-1.61119	0.892273	1.84467
	101	0.125625	-1.66192	0.815849	1.87633
	102	0.125625	-1.66192	0.815849	1.87633
	103	0.125625	-1.66192	0.815849	1.87633
	104	0.125625	-1.66192	0.815849	1.87633
	105	0.419052	-1.71907	0.713907	1.908

## Sheet: slot
slot numbers
A1	A2	A3	A4	A5	A6	A7
105	113	113	105	113	112	105
F1	F2	F3	F4	F5	F6	F7
105	113	113	105	113	112	105
location to front wall	A1		A2		A3		A4		A5		A6		A7	location to back wall
62	731.5	70.5	787.5	68	787.5	58	731.5	60	787.5	66	780.5	70	731.5	68
	F1		F2		F3		F4		F5		F6		F7
62	731.5	72	787.5	65.5	787.5	60	731.5	60	787.5	63	780.5	65	731.5	75
